# Supplementary material
Source: ML conference proceedings conference paper supplement (https://openaccess.thecvf.com/content/CVPR2024/html/Choi_vid-TLDR_Training_Free_CVPR_2024_paper.html)
Supplement: Supplementary file 1 [file Choi_vid-TLDR_Training_Free_CVPR_2024_supplemental.pdf]

# vid-TLDR: Training Free Token merging for Light-weight Video Transformer

## Supplementary Material

### A. A deeper exploration into temporal bias

We here present the discussion for the behavior of video Transformers regarding temporal bias. We have observed that the positional encoding in temporal-spatial attention even has learned the data bias, *i.e.*, the main contents of the clip are generally positioned at the front or middle. For better understanding, we visualize the attention map built with 1) positional encoding (PE) + representation, 2) representation only, and 3) PE only. Figure 1 reveals that PE of video Transformers causes the temporal bias, *i.e.* focusing on the early frame.

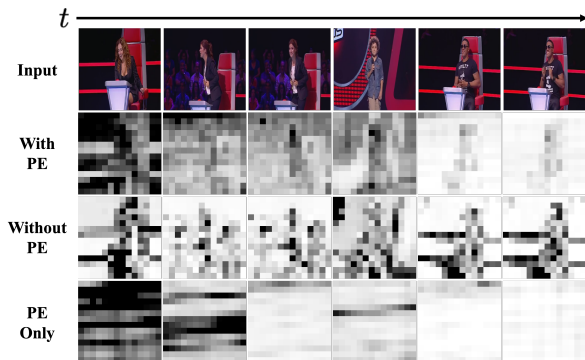

Figure 1. Visualization of temporal bias caused by PE.

### B. Detailed reduced number of tokens

In this section, we present the hyperparameters indicating the number of reduced tokens for each dataset and task, as shown in Table A. According to the main objective of vid-TLDR, which focuses on early-stage merging, all experiments involved reduction in the first four layers.

### C. Detailed video-text retrieval

In Table 2 of the main paper, we provide video-text retrieval by averaging the performances of video-to-text retrieval and text-to-retrieval. Here, we provide the detailed results of each task in Table B with MSRVTT [8], MSVD [4], ActivityNet [3], DiDeMo [1], LSMDC [7], SSV2-Label/Template [5].

### D. Zero-shot retrieval results

To validate the effectiveness of vid-TLDR, we report additional zero-shot retrieval results for baseline model [6], existing token merging method (ToMe [2]) and ours across MSVD [4], MSRVTT [8], DiDeMo [1], ActivityNet [3].

Table A. Number of tokens reduced in each experiment.

| Task          | Method        | Dataset     | Block index |     |     |     |         |
|---------------|---------------|-------------|-------------|-----|-----|-----|---------|
|               |               |             | 1           | 2   | 3   | 4   | 5 - Top |
| Retrieval     | UMT-B         | MSRVTT      | 600         | 200 | 100 | 0   | 0       |
|               |               | MSVD        | 450         | 250 | 200 | 0   | 0       |
|               |               | ActivityNet | 500         | 0   | 0   | 0   | 0       |
|               |               | DiDeMo      | 250         | 150 | 150 | 150 | 0       |
|               |               | LSMDC       | 400         | 150 | 150 | 0   | 0       |
|               |               | SSV2-Label  | 200         | 200 | 200 | 100 | 0       |
|               | SSV2-Template | 400         | 300         | 0   | 0   | 0   |         |
|               | UMT-L         | MSRVTT      | 550         | 400 | 0   | 0   | 0       |
|               |               | MSVD        | 600         | 200 | 100 | 100 | 0       |
|               |               | ActivityNet | 600         | 300 | 0   | 0   | 0       |
|               |               | DiDeMo      | 800         | 100 | 0   | 0   | 0       |
|               |               | LSMDC       | 250         | 250 | 200 | 200 | 0       |
| SSV2-Label    |               | 450         | 250         | 100 | 0   | 0   |         |
| SSV2-Template | 350           | 300         | 100         | 50  | 0   |     |         |
| VQA           | UMT-B         | MSRVTT      | 600         | 200 | 0   | 0   | 0       |
|               |               | MSVD        | 600         | 200 | 0   | 0   | 0       |
|               | UMT-L         | MSRVTT      | 400         | 400 | 100 | 0   | 0       |
|               |               | MSVD        | 400         | 400 | 100 | 0   | 0       |

All experiments were conducted with evaluation only, without additional training. The results for text-to-video and video-to-text retrieval accuracy across these four datasets are presented in Table C, D, E, F, and G. We conducted a grid search to determine the effective number of tokens to reduce. In the case of ToMe, tokens were merged uniformly across layers following the default configuration, and a grid search was conducted with 20-25 tokens per layer. On the other hand, our method merged in the first four front layers, exploring total reductions of 300, 330, and 360 tokens. Across all configurations, vid-TLDR consistently achieves higher R@1 with lower FLOPs compared to ToMe.

### References

- [1] Lisa Anne Hendricks, Oliver Wang, Eli Shechtman, Josef Sivic, Trevor Darrell, and Bryan Russell. Localizing moments in video with natural language. In *ICCV*, 2017. 1
- [2] Daniel Bolya, Cheng-Yang Fu, Xiaoliang Dai, Peizhao Zhang, Christoph Feichtenhofer, and Judy Hoffman. Token merging: Your vit but faster. *ICLR*, 2022. 1
- [3] Fabian Caba Heilbron, Victor Escorcia, Bernard Ghanem, and Juan Carlos Niebles. Activitynet: A large-scale video benchmark for human activity understanding. In *CVPR*, 2015. 1
- [4] David Chen and William Dolan. Collecting highly parallel data for paraphrase evaluation. In *Proceedings of the 49th An-*

Table B. Detailed results on text-to-video &amp; video-to-text retrieval.

| Dataset       | Metric   | Type  | UMT-B |       |       | UMT-L |       |       |
|---------------|----------|-------|-------|-------|-------|-------|-------|-------|
|               |          |       | Base  | ToMe  | Ours  | Base  | ToMe  | Ours  |
| MSRVTT        | GFLOPs ↓ | (G)   | 303.3 | 231.4 | 178.0 | 984.6 | 529.7 | 563.1 |
|               | R@1 ↑    | T2V   | 51.0  | 46.6  | 50.9  | 58.8  | 55.6  | 58.1  |
|               |          | V2T   | 49.0  | 47.4  | 50.7  | 58.6  | 56.0  | 58.7  |
|               | R@5 ↑    | T2V   | 76.5  | 71.8  | 75.8  | 81.0  | 79.7  | 81.0  |
|               |          | V2T   | 77.0  | 74.6  | 75.5  | 81.6  | 79.4  | 81.6  |
| R@10 ↑        | T2V      | 84.2  | 80.9  | 83.9  | 87.1  | 85.3  | 86.8  |       |
|               | V2T      | 84.7  | 83.2  | 83.9  | 86.5  | 86.8  | 86.9  |       |
| MSVD          | GFLOPs ↓ | (G)   | 303.3 | 218.7 | 181.3 | 984.6 | 574.5 | 563.1 |
|               | R@1 ↑    | T2V   | 50.8  | 47.8  | 50.5  | 58.2  | 57.1  | 57.9  |
|               |          | V2T   | 73.3  | 71.3  | 74.9  | 82.4  | 81.9  | 82.7  |
|               | R@5 ↑    | T2V   | 79.7  | 78.2  | 79.7  | 83.9  | 83.6  | 83.8  |
|               |          | V2T   | 88.8  | 89.4  | 90.0  | 94.6  | 93.9  | 94.5  |
| R@10 ↑        | T2V      | 85.7  | 85.5  | 86.3  | 89.6  | 89.4  | 89.4  |       |
|               | V2T      | 93.7  | 92.5  | 93.3  | 96.7  | 96.0  | 96.3  |       |
| ActivityNet   | GFLOPs ↓ | (G)   | 303.3 | 236.8 | 227.6 | 984.6 | 574.5 | 572.9 |
|               | R@1 ↑    | T2V   | 58.3  | 51.9  | 57.8  | 66.8  | 63.3  | 66.7  |
|               |          | V2T   | 56.0  | 51.4  | 55.4  | 64.4  | 61.7  | 63.9  |
|               | R@5 ↑    | T2V   | 83.9  | 80.8  | 83.7  | 89.1  | 87.3  | 88.6  |
|               |          | V2T   | 83.5  | 80.6  | 83.2  | 89.1  | 86.5  | 88.7  |
| R@10 ↑        | T2V      | 91.5  | 89.4  | 91.5  | 94.9  | 93.6  | 94.4  |       |
|               | V2T      | 91.7  | 89.9  | 91.1  | 94.8  | 93.6  | 94.5  |       |
| DiDeMo        | GFLOPs ↓ | (G)   | 303.3 | 218.7 | 212.8 | 984.6 | 574.5 | 559.0 |
|               | R@1 ↑    | T2V   | 63.7  | 56.4  | 64.1  | 72.5  | 68.7  | 72.3  |
|               |          | V2T   | 60.5  | 58.2  | 60.8  | 69.2  | 67.3  | 68.5  |
|               | R@5 ↑    | T2V   | 87.8  | 82.3  | 87.2  | 91.2  | 89.5  | 91.2  |
|               |          | V2T   | 85.7  | 82.8  | 85.1  | 89.9  | 89.2  | 89.8  |
| R@10 ↑        | T2V      | 93.5  | 89.0  | 92.7  | 94.8  | 94.6  | 94.2  |       |
|               | V2T      | 90.7  | 89.5  | 90.4  | 94.1  | 92.9  | 93.8  |       |
| LSMDC         | GFLOPs ↓ | (G)   | 303.3 | 223.2 | 206.2 | 984.6 | 574.5 | 583.7 |
|               | R@1 ↑    | T2V   | 32.7  | 25.6  | 32.9  | 43.0  | 39.7  | 43.1  |
|               |          | V2T   | 32.7  | 29.0  | 31.8  | 41.4  | 38.7  | 40.7  |
|               | R@5 ↑    | T2V   | 54.7  | 47.6  | 53.6  | 65.5  | 61.8  | 64.5  |
|               |          | V2T   | 53.5  | 50.5  | 52.9  | 64.3  | 61.4  | 63.6  |
| R@10 ↑        | T2V      | 63.4  | 57.6  | 63.3  | 73.0  | 61.8  | 71.4  |       |
|               | V2T      | 63.2  | 57.0  | 63.1  | 71.5  | 67.9  | 70.2  |       |
| SSV2-label    | GFLOPs ↓ | (G)   | 303.3 | 232.2 | 212.9 | 984.6 | 627.2 | 610.9 |
|               | R@1 ↑    | T2V   | 64.1  | 58.7  | 64.3  | 73.3  | 69.4  | 73.1  |
|               |          | V2T   | 63.8  | 61.7  | 63.3  | 71.5  | 70.3  | 71.1  |
|               | R@5 ↑    | T2V   | 88.2  | 84.9  | 88.0  | 93.7  | 92.1  | 93.3  |
|               |          | V2T   | 88.3  | 87.2  | 87.4  | 93.1  | 92.3  | 92.7  |
| R@10 ↑        | T2V      | 92.7  | 90.8  | 92.6  | 96.6  | 95.8  | 96.6  |       |
|               | V2T      | 93.2  | 92.4  | 92.9  | 96.7  | 95.8  | 96.4  |       |
| SSV2-Template | GFLOPs ↓ | (G)   | 303.3 | 241.4 | 203.7 | 984.6 | 627.2 | 572.9 |
|               | R@1 ↑    | T2V   | 87.9  | 85.1  | 87.4  | 90.8  | 88.5  | 90.2  |
|               |          | V2T   | 61.3  | 59.5  | 60.6  | 66.1  | 65.5  | 66.0  |
|               | R@5 ↑    | T2V   | 99.4  | 100.0 | 99.4  | 99.4  | 98.9  | 100.0 |
|               |          | V2T   | 88.5  | 87.9  | 87.4  | 92.3  | 91.4  | 91.7  |
| R@10 ↑        | T2V      | 100.0 | 100.0 | 100.0 | 100.0 | 100.0 | 100.0 |       |
|               | V2T      | 93.7  | 93.1  | 92.6  | 95.6  | 95.5  | 95.8  |       |

Table C. Comparison of zero-shot retrieval performance for four datasets.

| Dataset | #Pairs | Metric   | UMT-B |             |                    | UMT-L       |             |                    |
|---------|--------|----------|-------|-------------|--------------------|-------------|-------------|--------------------|
|         |        |          | Base  | ToMe        | Ours               | Base        | ToMe        | Ours               |
| MSVD    | 5M     | GFLOPs ↓ | 78.5  | 66.2        | <b>50.6</b>        | 267.8       | 182.1       | <b>165.3</b>       |
|         |        | R@1 ↑    | 47.4  | 45.6 (-1.8) | <b>48.1</b> (+0.7) | 55.3        | 53.6 (-1.7) | <b>56.3</b> (+1.0) |
|         |        | R@5 ↑    | 72.2  | 70.8 (-1.4) | <b>72.5</b> (+0.3) | 79.4        | 78.9 (-0.5) | <b>79.6</b> (+0.2) |
|         |        | R@10 ↑   | 80.2  | 79.8 (-0.4) | <b>80.4</b> (+0.2) | 85.9        | 85.1 (-0.8) | <b>86.1</b> (+0.2) |
|         | 17M    | GFLOPs ↓ | 78.5  | 62.8        | <b>50.2</b>        | 267.8       | 182.1       | <b>165.3</b>       |
|         |        | R@1 ↑    | 52.0  | 50.7 (-1.3) | <b>53.3</b> (+1.3) | <b>62.7</b> | 61.0 (-1.7) | <b>62.7</b> (±0.0) |
|         |        | R@5 ↑    | 75.7  | 74.8 (-0.9) | <b>77.0</b> (+1.3) | 83.7        | 83.2 (-0.5) | <b>83.8</b> (+0.1) |
|         |        | R@10 ↑   | 83.6  | 83.0 (-0.6) | <b>84.0</b> (+0.4) | 89.7        | 88.8 (-0.9) | <b>90.3</b> (+0.6) |
|         | 25M    | GFLOPs ↓ | 78.5  | 66.2        | <b>50.6</b>        | 267.8       | 182.1       | <b>153.6</b>       |
|         |        | R@1 ↑    | 52.1  | 50.1 (-2.0) | <b>53.6</b> (+1.5) | 61.8        | 60.3 (-1.5) | <b>62.5</b> (+0.7) |
|         |        | R@5 ↑    | 77.1  | 76.1 (-1.0) | <b>78.1</b> (+1.0) | 83.3        | 82.5 (-0.8) | <b>83.2</b> (-0.1) |
|         |        | R@10 ↑   | 84.7  | 84.1 (-0.6) | <b>85.4</b> (+0.7) | 88.8        | 88.3 (-0.5) | <b>88.8</b> (±0.0) |
| MSRVTT  | 5M     | GFLOPs ↓ | 78.5  | 66.2        | <b>50.2</b>        | 267.8       | 182.1       | <b>164.8</b>       |
|         |        | R@1 ↑    | 27.9  | 26.4 (-1.5) | <b>27.7</b> (-0.2) | 31.8        | 30.4 (-1.4) | <b>32.7</b> (+0.9) |
|         |        | R@5 ↑    | 49.8  | 46.7 (-3.1) | <b>49.8</b> (±0.0) | 54.7        | 52.4 (-2.3) | <b>55.1</b> (+0.4) |
|         |        | R@10 ↑   | 58.4  | 55.9 (-2.5) | <b>58.3</b> (-0.1) | 64.2        | 62.9 (-1.3) | <b>64.6</b> (+0.4) |
|         | 17M    | GFLOPs ↓ | 78.5  | 66.2        | <b>50.6</b>        | 267.8       | 182.1       | <b>163.0</b>       |
|         |        | R@1 ↑    | 33.6  | 32.5 (-1.1) | <b>33.8</b> (+0.2) | 40.6        | 37.6 (-3.0) | <b>39.9</b> (-0.7) |
|         |        | R@5 ↑    | 56.4  | 54.1 (-2.3) | <b>57.0</b> (+0.6) | 62.0        | 60.1 (-1.9) | <b>61.9</b> (-0.1) |
|         |        | R@10 ↑   | 66.4  | 63.9 (-2.5) | <b>66.6</b> (+0.2) | 71.4        | 68.9 (-2.5) | <b>70.9</b> (-0.5) |
|         | 25M    | GFLOPs ↓ | 78.5  | 66.2        | <b>44.7</b>        | 267.8       | 160.9       | <b>146.5</b>       |
|         |        | R@1 ↑    | 32.8  | 31.1 (-1.7) | <b>33.3</b> (+0.5) | 38.9        | 36.3 (-2.6) | <b>39.2</b> (+0.3) |
|         |        | R@5 ↑    | 54.3  | 52.8 (-1.5) | <b>54.7</b> (+0.4) | 61.1        | 59.0 (-2.1) | <b>61.2</b> (+0.1) |
|         |        | R@10 ↑   | 32.8  | 31.1 (-1.7) | <b>33.3</b> (+0.5) | 38.9        | 36.3 (-2.6) | <b>39.2</b> (+0.3) |
| DIDEMO  | 5M     | GFLOPs ↓ | 78.5  | 66.2        | <b>47.3</b>        | 267.8       | 182.1       | <b>166.2</b>       |
|         |        | R@1 ↑    | 35.8  | 29.7 (-6.1) | <b>35.9</b> (+0.1) | 35.1        | 33.7 (-1.4) | <b>36.6</b> (+1.5) |
|         |        | R@5 ↑    | 61.9  | 55.5 (-6.4) | <b>60.6</b> (-1.3) | 60.2        | 60.0 (-0.2) | <b>62.1</b> (+1.9) |
|         |        | R@10 ↑   | 70.1  | 65.1 (-5.0) | <b>69.0</b> (-1.1) | 68.7        | 69.5 (+0.8) | <b>71.0</b> (+2.3) |
|         | 17M    | GFLOPs ↓ | 78.5  | 62.8        | <b>44.5</b>        | 267.8       | 182.1       | <b>166.7</b>       |
|         |        | R@1 ↑    | 41.1  | 38.6 (-2.5) | <b>42.3</b> (+1.2) | 46.5        | 45.4 (-1.0) | <b>48.7</b> (+2.2) |
|         |        | R@5 ↑    | 66.7  | 64.7 (-2.0) | <b>68.4</b> (+1.7) | 71.1        | 71.8 (+0.7) | <b>74.3</b> (+3.2) |
|         |        | R@10 ↑   | 75.4  | 73.8 (-1.6) | <b>77.0</b> (+1.6) | 79.2        | 80.1 (+0.9) | <b>81.3</b> (+2.1) |
|         | 25M    | GFLOPs ↓ | 78.5  | 62.8        | <b>48.2</b>        | 267.8       | 182.1       | <b>162.5</b>       |
|         |        | R@1 ↑    | 41.0  | 38.6 (-2.4) | <b>44.0</b> (+3.0) | 49.3        | 47.9 (-1.3) | <b>52.0</b> (+2.8) |
|         |        | R@5 ↑    | 66.6  | 64.5 (-2.1) | <b>68.9</b> (+2.3) | 73.9        | 72.6 (-1.3) | <b>74.9</b> (+1.1) |
|         |        | R@10 ↑   | 75.8  | 73.0 (-2.8) | <b>77.7</b> (+1.9) | 80.2        | 81.1 (+0.9) | <b>82.4</b> (+2.2) |
| ANET    | 5M     | GFLOPs ↓ | 78.5  | 66.2        | <b>49.0</b>        | 267.8       | 182.1       | <b>162.0</b>       |
|         |        | R@1 ↑    | 27.1  | 24.9 (-2.2) | <b>28.1</b> (+1.0) | 31.0        | 29.7 (-1.3) | <b>31.3</b> (+0.3) |
|         |        | R@5 ↑    | 51.6  | 49.1 (-2.5) | <b>52.4</b> (+0.8) | 59.7        | 57.9 (-1.8) | <b>59.6</b> (-0.1) |
|         |        | R@10 ↑   | 63.0  | 61.0 (-2.0) | <b>64.1</b> (+1.1) | 71.7        | 70.2 (-1.5) | <b>71.6</b> (-0.1) |
|         | 17M    | GFLOPs ↓ | 78.5  | 62.8        | <b>45.0</b>        | 267.8       | 182.1       | <b>151.7</b>       |
|         |        | R@1 ↑    | 32.7  | 31.7 (-1.0) | <b>33.9</b> (+1.2) | 41.8        | 40.3 (-1.5) | <b>41.7</b> (-0.1) |
|         |        | R@5 ↑    | 57.7  | 57.4 (-0.3) | <b>59.6</b> (+1.9) | 68.6        | 67.1 (-1.5) | <b>68.8</b> (+0.2) |
|         |        | R@10 ↑   | 69.2  | 68.9 (-0.3) | <b>70.7</b> (+1.5) | 79.2        | 78.2 (-1.0) | <b>79.1</b> (-0.1) |
|         | 25M    | GFLOPs ↓ | 78.5  | 62.8        | <b>51.0</b>        | 267.8       | 182.1       | <b>152.7</b>       |
|         |        | R@1 ↑    | 34.2  | 32.6 (-1.6) | <b>35.7</b> (+1.5) | 40.7        | 41.0 (+0.3) | <b>41.8</b> (+1.1) |
|         |        | R@5 ↑    | 59.1  | 58.1 (-1.0) | <b>60.9</b> (+1.8) | 67.9        | 67.8 (-0.1) | <b>68.4</b> (+0.5) |
|         |        | R@10 ↑   | 70.5  | 69.5 (-1.0) | <b>72.0</b> (+1.5) | 79.3        | 78.4 (-0.9) | <b>79.0</b> (-0.3) |

Table D. Detailed zero-shot retrieval performance on MSVD.

| Dataset | Pairs   | Metic   | Type | UMT-B |      |       | UMT-L |       |       |
|---------|---------|---------|------|-------|------|-------|-------|-------|-------|
|         |         |         |      | Base  | ToMe | Ours  | Base  | ToMe  | Ours  |
| MSVD    | 5M      | FLOPS ↓ | (G)  | 78.5  | 66.2 | 50.6  | 267.8 | 182.1 | 165.3 |
|         |         | R@1 ↑   | T2V  | 36.2  | 33.6 | 37.0  | 44.4  | 42.0  | 44.3  |
|         |         |         | V2T  | 58.5  | 57.5 | 59.1  | 66.1  | 65.2  | 68.2  |
|         |         | R@5 ↑   | T2V  | 65.7  | 64.3 | 66.1  | 73.3  | 72.0  | 73.2  |
|         | V2T     |         | 78.7 | 77.3  | 78.8 | 85.5  | 85.8  | 86.0  |       |
|         | R@10 ↑  | T2V     | 76.1 | 74.8  | 76.4 | 82.4  | 80.5  | 82.0  |       |
|         |         | V2T     | 84.3 | 84.8  | 84.3 | 89.4  | 89.6  | 90.2  |       |
|         | 17M     | FLOPS ↓ | (G)  | 78.5  | 62.8 | 50.2  | 267.8 | 182.1 | 165.3 |
|         |         | R@1 ↑   | T2V  | 41.4  | 38.6 | 42.2  | 49.9  | 48.1  | 50.0  |
|         |         |         | V2T  | 62.5  | 62.8 | 64.3  | 75.4  | 73.9  | 75.4  |
|         |         | R@5 ↑   | T2V  | 70.6  | 69.0 | 71.3  | 77.7  | 76.6  | 77.6  |
|         | V2T     |         | 80.8 | 80.5  | 82.7 | 89.6  | 89.7  | 90.0  |       |
| R@10 ↑  | T2V     | 80.1    | 78.9 | 80.5  | 85.3 | 84.3  | 85.5  |       |       |
|         | V2T     | 87.0    | 87.0 | 87.5  | 94.0 | 93.3  | 95.1  |       |       |
| 25M     | FLOPS ↓ | (G)     | 78.5 | 66.2  | 50.6 | 267.8 | 182.1 | 153.6 |       |
|         | R@1 ↑   | T2V     | 42.3 | 39.0  | 42.7 | 49.0  | 48.1  | 49.3  |       |
|         |         | V2T     | 61.9 | 61.2  | 64.5 | 74.5  | 72.4  | 75.7  |       |
|         | R@5 ↑   | T2V     | 71.7 | 69.6  | 72.1 | 76.9  | 75.4  | 77.0  |       |
| V2T     |         | 82.5    | 82.5 | 84.0  | 89.7 | 89.6  | 89.4  |       |       |
| R@10 ↑  | T2V     | 80.8    | 79.4 | 81.3  | 84.7 | 83.2  | 84.2  |       |       |
|         | V2T     | 88.5    | 88.8 | 89.4  | 92.8 | 93.3  | 93.3  |       |       |

Table E. Detailed zero-shot retrieval performance on MSRVTT.

| Dataset | Pairs   | Metic   | Type | UMT-B |      |       | UMT-L |       |       |
|---------|---------|---------|------|-------|------|-------|-------|-------|-------|
|         |         |         |      | Base  | ToMe | Ours  | Base  | ToMe  | Ours  |
| MSRVTT  | 5M      | FLOPS ↓ | (G)  | 78.5  | 66.2 | 50.2  | 267.8 | 182.1 | 164.8 |
|         |         | R@1 ↑   | T2V  | 29.6  | 27.8 | 29.9  | 33.3  | 31.4  | 34.0  |
|         |         |         | V2T  | 26.2  | 25.0 | 25.4  | 30.2  | 29.4  | 31.3  |
|         |         | R@5 ↑   | T2V  | 52.8  | 48.4 | 52.3  | 58.1  | 53.3  | 57.1  |
|         | V2T     |         | 46.7 | 44.9  | 47.3 | 51.3  | 51.4  | 53.0  |       |
|         | R@10 ↑  | T2V     | 61.9 | 57.4  | 61.6 | 66.7  | 64.4  | 66.1  |       |
|         |         | V2T     | 54.9 | 54.3  | 55.0 | 61.6  | 61.4  | 63.1  |       |
|         | 17M     | FLOPS ↓ | (G)  | 78.5  | 66.2 | 50.6  | 267.8 | 182.1 | 163.0 |
|         |         | R@1 ↑   | T2V  | 35.5  | 32.5 | 36.5  | 42.6  | 39.7  | 42.1  |
|         |         |         | V2T  | 31.6  | 32.4 | 31.0  | 38.6  | 35.5  | 37.7  |
|         |         | R@5 ↑   | T2V  | 59.3  | 55.8 | 59.6  | 64.4  | 62.0  | 63.9  |
|         | V2T     |         | 53.5 | 52.3  | 54.4 | 59.6  | 58.1  | 59.8  |       |
| R@10 ↑  | T2V     | 68.6    | 64.1 | 68.9  | 73.1 | 70.5  | 72.4  |       |       |
|         | V2T     | 64.1    | 63.7 | 64.2  | 69.6 | 67.3  | 69.4  |       |       |
| 25M     | FLOPS ↓ | (G)     | 78.5 | 66.2  | 44.7 | 267.8 | 160.9 | 146.5 |       |
|         | R@1 ↑   | T2V     | 35.2 | 31.7  | 35.3 | 40.7  | 37.9  | 41.0  |       |
|         |         | V2T     | 30.3 | 30.4  | 31.3 | 37.1  | 34.6  | 37.4  |       |
|         | R@5 ↑   | T2V     | 57.8 | 53.9  | 57.4 | 63.4  | 61.4  | 63.6  |       |
| V2T     |         | 50.7    | 51.7 | 52.0  | 58.7 | 56.6  | 58.8  |       |       |
| R@10 ↑  | T2V     | 66.0    | 61.8 | 65.6  | 71.8 | 69.0  | 71.5  |       |       |
|         | V2T     | 61.4    | 62.2 | 62.8  | 68.9 | 66.2  | 68.6  |       |       |

Table F. Detailed zero-shot retrieval performance on DiDeMo

| Dataset | #Pairs  | Metic   | Type | UMT-B |      |       | UMT-L |       |       |
|---------|---------|---------|------|-------|------|-------|-------|-------|-------|
|         |         |         |      | Base  | ToMe | Ours  | Base  | ToMe  | Ours  |
| DiDeMo  | 5M      | FLOPs ↓ | (G)  | 78.5  | 66.2 | 47.3  | 267.8 | 182.1 | 166.2 |
|         |         | R@1 ↑   | T2V  | 35.7  | 28.0 | 35.6  | 34.0  | 32.1  | 35.9  |
|         |         |         | V2T  | 35.8  | 31.4 | 36.1  | 36.2  | 35.3  | 37.2  |
|         |         | R@5 ↑   | T2V  | 62.2  | 52.9 | 61.2  | 60.4  | 57.7  | 61.0  |
|         | V2T     |         | 61.6 | 58.1  | 60.0 | 60.0  | 62.3  | 63.2  |       |
|         | R@10 ↑  | T2V     | 70.6 | 62.3  | 69.3 | 68.7  | 67.9  | 70.2  |       |
|         |         | V2T     | 69.6 | 67.9  | 68.7 | 68.6  | 71.2  | 71.9  |       |
|         | 17M     | FLOPs ↓ | (G)  | 78.5  | 62.8 | 44.5  | 267.8 | 182.1 | 166.7 |
|         |         | R@1 ↑   | T2V  | 41.9  | 36.9 | 42.6  | 46.4  | 44.8  | 49.7  |
|         |         |         | V2T  | 40.3  | 40.3 | 42.0  | 46.5  | 46.0  | 47.6  |
|         |         | R@5 ↑   | T2V  | 66.7  | 63.0 | 68.6  | 70.0  | 72.3  | 73.9  |
|         | V2T     |         | 66.6 | 66.4  | 68.3 | 72.2  | 71.3  | 74.8  |       |
| R@10 ↑  | T2V     | 75.0    | 71.9 | 77.2  | 78.8 | 80.2  | 80.9  |       |       |
|         | V2T     | 75.8    | 75.8 | 76.8  | 79.5 | 79.9  | 81.6  |       |       |
| 25M     | FLOPs ↓ | (G)     | 78.5 | 62.8  | 48.2 | 267.8 | 160.9 | 162.5 |       |
|         | R@1 ↑   | T2V     | 41.2 | 35.6  | 44.6 | 48.6  | 47.9  | 52.0  |       |
|         |         | V2T     | 40.8 | 41.5  | 43.4 | 49.9  | 48.4  | 52.0  |       |
|         | R@5 ↑   | T2V     | 65.4 | 62.0  | 68.9 | 72.9  | 72.9  | 74.0  |       |
| V2T     |         | 67.7    | 67.0 | 68.9  | 74.8 | 74.1  | 75.9  |       |       |
| R@10 ↑  | T2V     | 74.9    | 70.2 | 76.8  | 79.0 | 80.1  | 81.0  |       |       |
|         | V2T     | 76.7    | 75.9 | 78.6  | 81.4 | 81.6  | 83.8  |       |       |

Table G. Detailed zero-shot retrieval performance on Activitynet.

| Dataset | #Pairs  | Metic   | Type | UMT-B |      |       | UMT-L |       |       |
|---------|---------|---------|------|-------|------|-------|-------|-------|-------|
|         |         |         |      | Base  | ToMe | Ours  | Base  | ToMe  | Ours  |
| ANET    | 5M      | FLOPs ↓ | (G)  | 78.5  | 66.2 | 49.0  | 267.8 | 182.1 | 162.0 |
|         |         | R@1 ↑   | T2V  | 28.3  | 24.7 | 29.3  | 31.9  | 29.4  | 31.4  |
|         |         |         | V2T  | 25.9  | 25.1 | 26.8  | 30.0  | 30.1  | 31.1  |
|         |         | R@5 ↑   | T2V  | 53.0  | 48.9 | 53.2  | 60.2  | 57.4  | 59.6  |
|         | V2T     |         | 50.2 | 49.4  | 51.6 | 59.1  | 58.5  | 59.6  |       |
|         | R@10 ↑  | T2V     | 64.2 | 60.5  | 64.3 | 72.0  | 69.6  | 71.5  |       |
|         |         | V2T     | 61.7 | 61.4  | 64.0 | 71.3  | 70.9  | 71.7  |       |
|         | 17M     | FLOPs ↓ | (G)  | 78.5  | 62.8 | 45.0  | 267.8 | 182.1 | 151.7 |
|         |         | R@1 ↑   | T2V  | 33.8  | 31.5 | 34.6  | 42.8  | 40.1  | 42.1  |
|         |         |         | V2T  | 31.6  | 32.0 | 33.2  | 40.7  | 40.4  | 41.2  |
|         |         | R@5 ↑   | T2V  | 59.1  | 57.4 | 60.7  | 69.6  | 67.0  | 69.4  |
|         | V2T     |         | 56.2 | 57.5  | 58.5 | 67.6  | 67.2  | 68.2  |       |
| R@10 ↑  | T2V     | 70.4    | 68.5 | 71.1  | 79.8 | 77.9  | 79.2  |       |       |
|         | V2T     | 67.9    | 69.2 | 70.3  | 78.6 | 78.5  | 79.1  |       |       |
| 25M     | FLOPs ↓ | (G)     | 78.5 | 62.8  | 51.0 | 267.8 | 182.1 | 152.7 |       |
|         | R@1 ↑   | T2V     | 35.5 | 32.6  | 36.4 | 41.9  | 41.6  | 42.8  |       |
|         |         | V2T     | 32.8 | 32.6  | 34.9 | 39.5  | 40.4  | 40.8  |       |
|         | R@5 ↑   | T2V     | 60.6 | 57.8  | 61.3 | 68.6  | 68.1  | 68.8  |       |
| V2T     |         | 57.6    | 58.5 | 60.5  | 67.6 | 67.5  | 67.9  |       |       |
| R@10 ↑  | T2V     | 71.8    | 69.0 | 72.4  | 79.6 | 78.7  | 79.6  |       |       |
|         | V2T     | 69.2    | 70.1 | 71.6  | 78.4 | 78.2  | 78.5  |       |       |

*nual Meeting of the Association for Computational Linguistics: Human Language Technologies*, 2011. [1](#)

- [5] Jie Lei, Tamara L. Berg, and Mohit Bansal. Revealing single frame bias for video-and-language learning. In *ACL*, 2023. [1](#)
- [6] Kunchang Li, Yali Wang, Yizhuo Li, Yi Wang, Yinan He, Limin Wang, and Yu Qiao. Unmasked teacher: Towards training-efficient video foundation models. *ICCV*, 2023. [1](#)
- [7] Anna Rohrbach, Atousa Torabi, Marcus Rohrbach, Niket Tandon, Christopher Pal, Hugo Larochelle, Aaron Courville, and Bernt Schiele. Movie description. *IJCV*, 2017. [1](#)
- [8] Jun Xu, Tao Mei, Ting Yao, and Yong Rui. Msr-vtt: A large video description dataset for bridging video and language. In *CVPR*, 2016. [1](#)
